# Supplementary material
Source: PubMed Central journal article supplement (PMC1941486)

CD4<sup>+</sup> cellsCD8<sup>+</sup> cells

control

Ag85A<sub>241-260</sub>  
Ag85B<sub>240-260</sub>

control

Mtb32<sub>309-318</sub>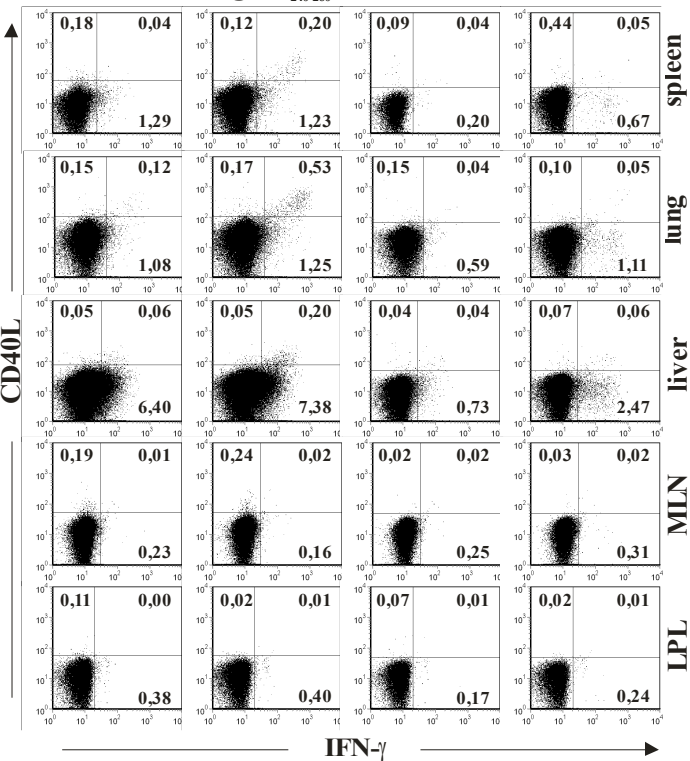

Supplement: pnas_0703510104_1.pdf [file pnas_0703510104_1.pdf]

**% IFN- $\gamma$ <sup>+</sup> of CD8<sup>+</sup> cells**

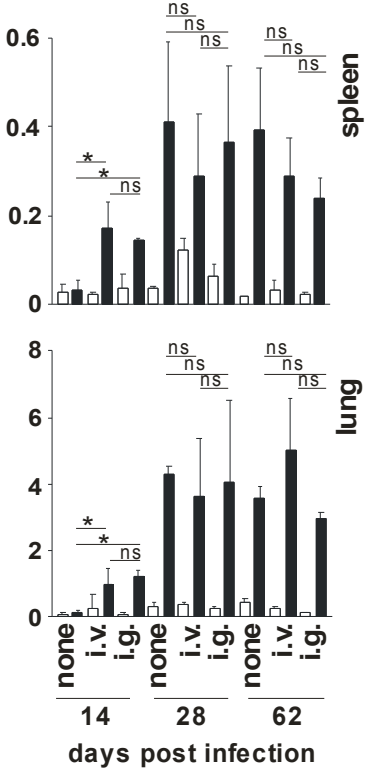

Supplement: pnas_0703510104_10.pdf [file pnas_0703510104_10.pdf]

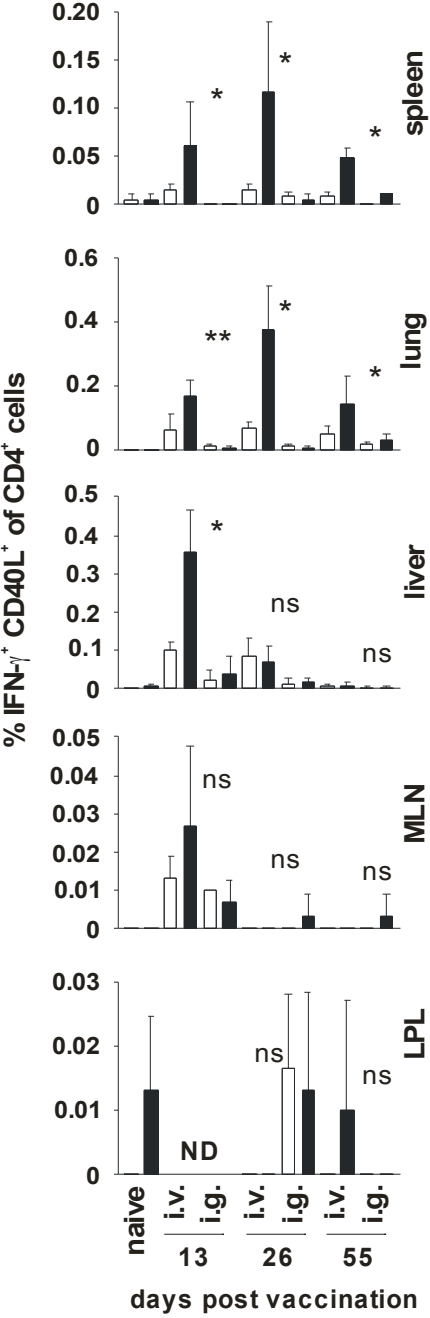

Supplement: pnas_0703510104_2.pdf [file pnas_0703510104_2.pdf]

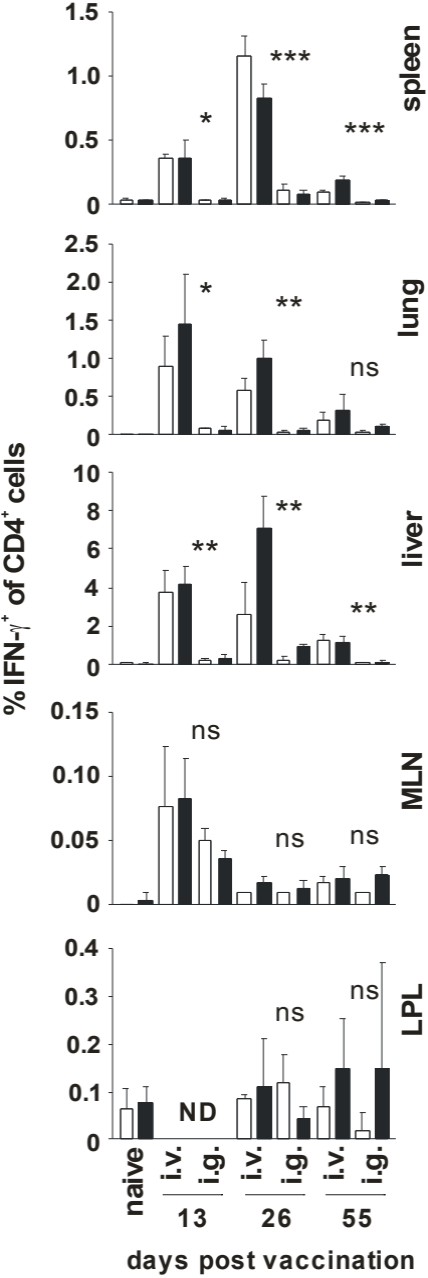

Supplement: pnas_0703510104_3.pdf [file pnas_0703510104_3.pdf]

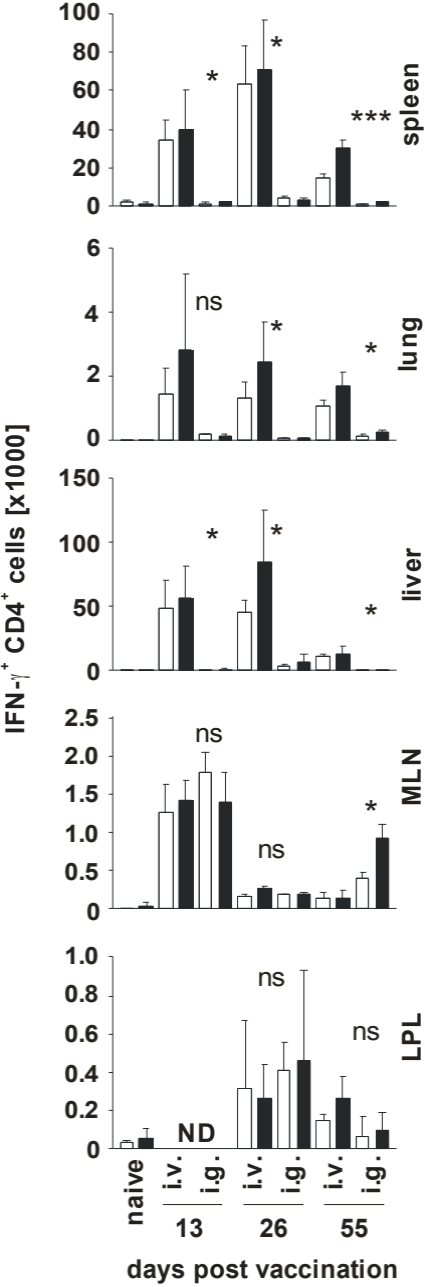

Supplement: pnas_0703510104_4.pdf [file pnas_0703510104_4.pdf]

% IFN- $\gamma$ <sup>+</sup> of CD8<sup>+</sup> cells

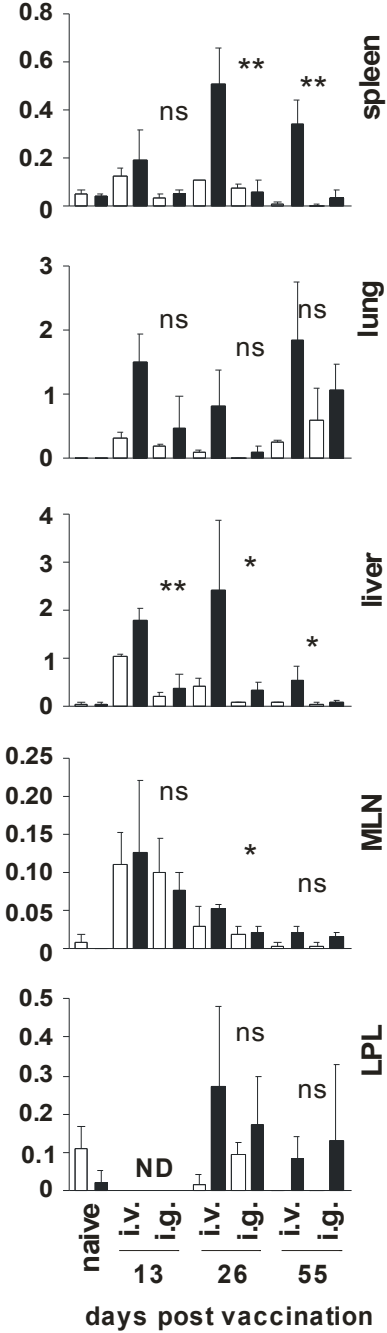

Supplement: pnas_0703510104_5.pdf [file pnas_0703510104_5.pdf]

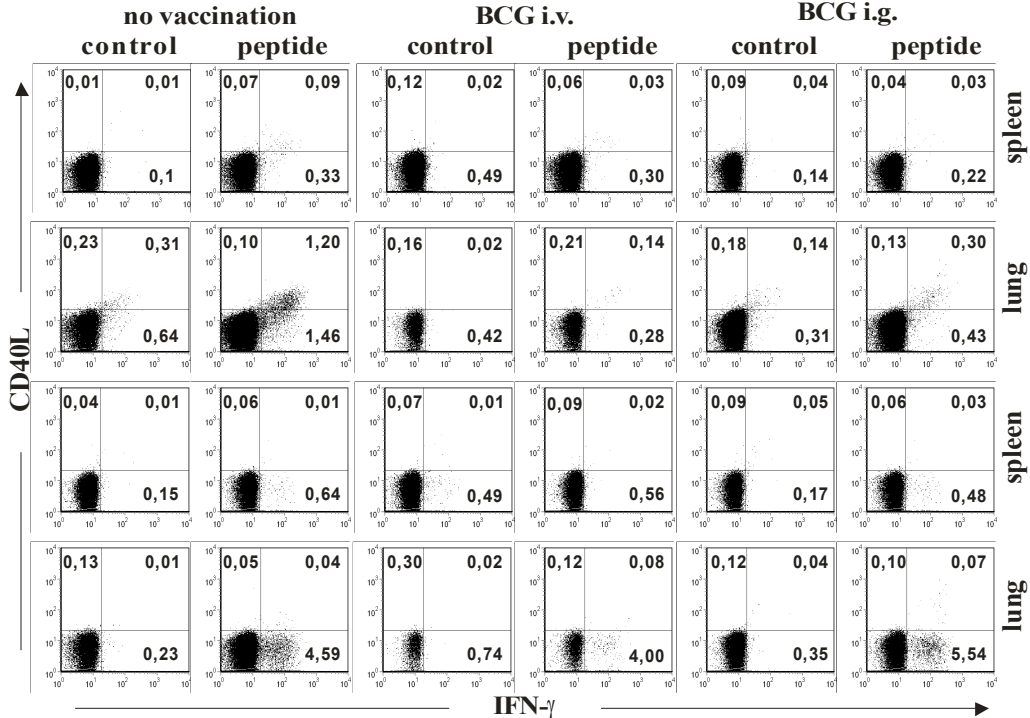

Supplement: pnas_0703510104_6.pdf [file pnas_0703510104_6.pdf]

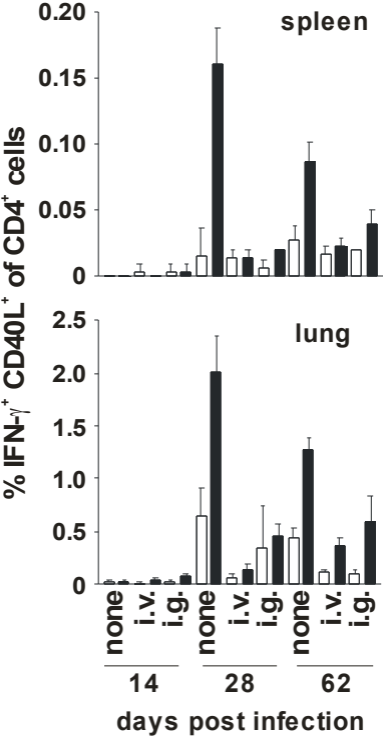

Supplement: pnas_0703510104_7.pdf [file pnas_0703510104_7.pdf]

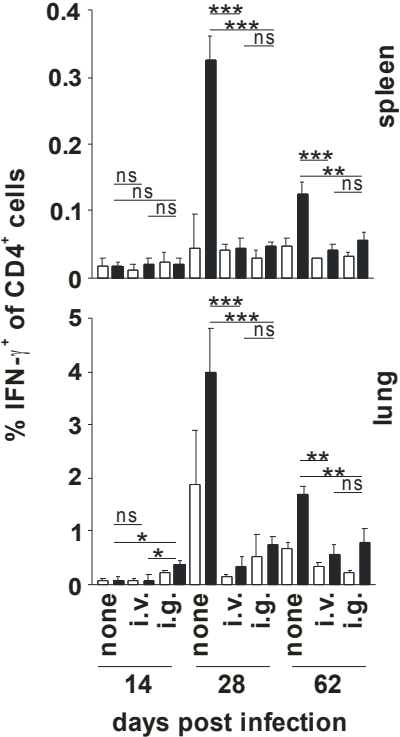

Supplement: pnas_0703510104_8.pdf [file pnas_0703510104_8.pdf]

**IFN- $\gamma$ <sup>+</sup> CD4<sup>+</sup> cells [x10000]**

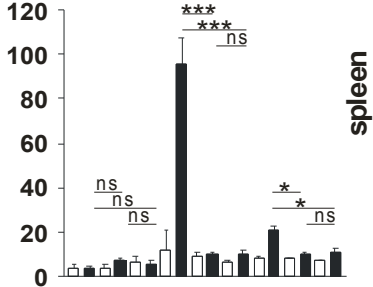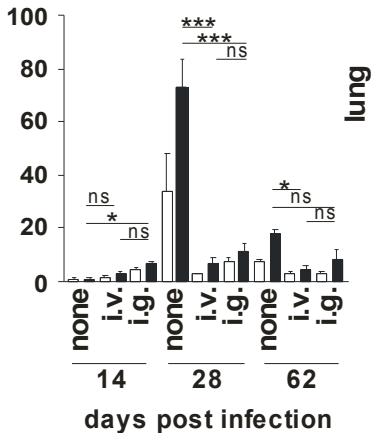

Supplement: pnas_0703510104_9.pdf [file pnas_0703510104_9.pdf]
